# Supplementary material for: Genome-wide association study for flowering time, maturity dates and plant height in early maturing soybean (Glycine max) germplasm
Source: PubMed Central journal article supplement (PMC4449526; doi:10.1186/s12864-015-1441-4), 2015-03-20
Supplement: 12864_2015_1441_MOESM2_ESM.pdf [file 12864_2015_1441_MOESM2_ESM.pdf]

**Additional file 2: Bayesian Information Criterion (BIC) values of mixed linear model with different numbers of principal components (PCs) used for associate analyses of each trait.**

| No. of PCs | BIC <sup>a</sup> |         |         |          |
|------------|------------------|---------|---------|----------|
|            | DTF              | DTM     | DFTM    | PH       |
| 0          | -671.66          | -746.05 | -722.88 | -1158.49 |
| 1          | -674.39          | -748.81 | -725.36 | -1161.30 |
| 2          | -674.58          | -750.75 | -718.43 | -1163.48 |
| 3          | -676.76          | -753.00 | -721.27 | -1166.30 |
| 4          | -678.61          | -755.87 | -722.78 | -1162.13 |
| 5          | -681.00          | -756.79 | -725.55 | -1163.72 |
| 6          | -683.81          | -758.82 | -728.40 | -1165.60 |
| 7          | -686.61          | -761.45 | -730.60 | -1168.45 |
| 8          | -689.36          | -763.97 | -732.31 | -1171.28 |
| 9          | -689.32          | -763.75 | -735.05 | -1171.49 |
| 10         | -691.25          | -766.58 | -733.21 | -1174.35 |

DTF, days to flowering; DTM, days to maturity; DFTM, duration of flowering-to-maturity; PH, plant height.

<sup>a</sup> Larger is better.
