# Supplementary material for: Genome-wide association study for flowering time, maturity dates and plant height in early maturing soybean (Glycine max) germplasm
Source: PubMed Central journal article supplement (PMC4449526; doi:10.1186/s12864-015-1441-4), 2015-03-20
Supplement: 12864_2015_1441_MOESM3_ESM.pdf [file 12864_2015_1441_MOESM3_ESM.pdf]

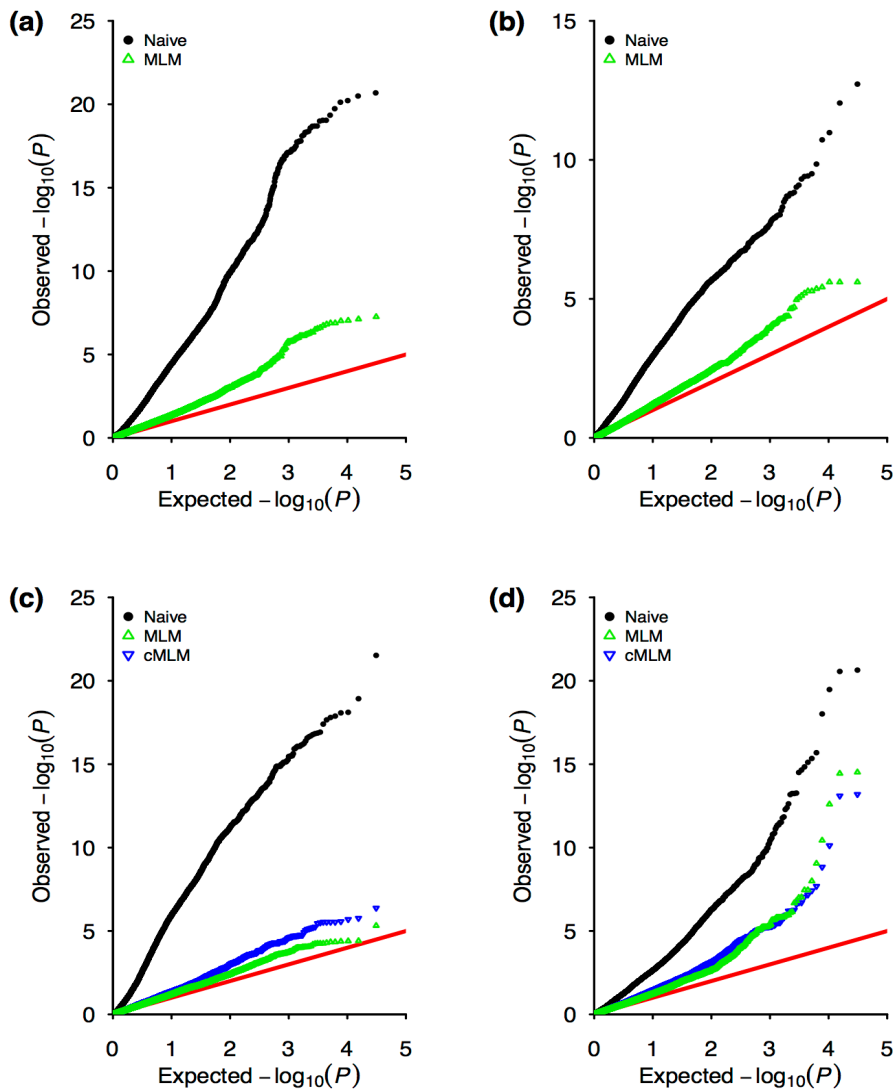

**Additional file 3: Quantile-quantile plots of genome-wide association analysis for each trait with different models.** For days to flowering (a) and maturity (b), the naive model and regular mixed model (MLM) are presented. For duration of flowering-to-maturity (c) and plant height (d), the naive model, MLM and compressed MLM (cMLM) are presented. The expected distribution of negative  $\log_{10}$ -transformed  $P$  values is indicated in red, and those of the naive model, MLM and/or cMLM are indicated in black, green and/or blue, respectively.
