# Supplementary material for: Genome-wide association study for flowering time, maturity dates and plant height in early maturing soybean (Glycine max) germplasm
Source: PubMed Central journal article supplement (PMC4449526; doi:10.1186/s12864-015-1441-4), 2015-03-20
Supplement: 12864_2015_1441_MOESM4_ESM.pdf [file 12864_2015_1441_MOESM4_ESM.pdf]

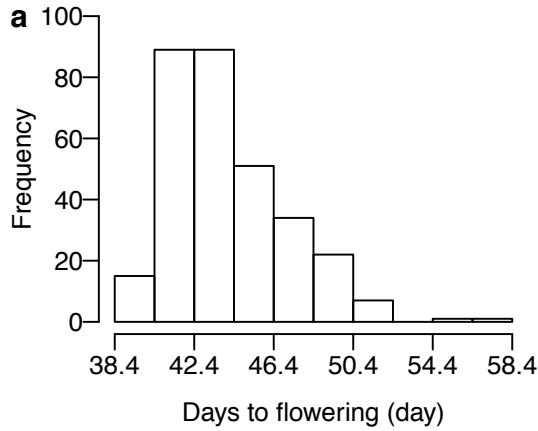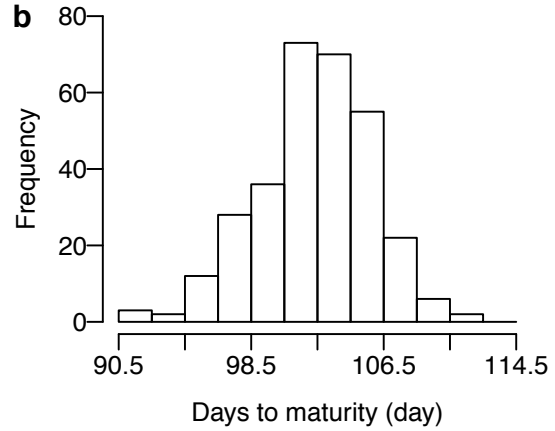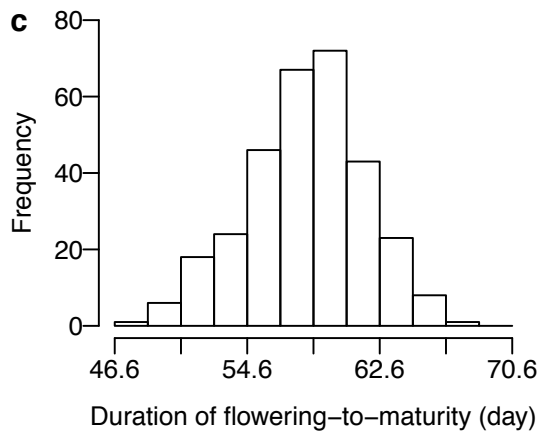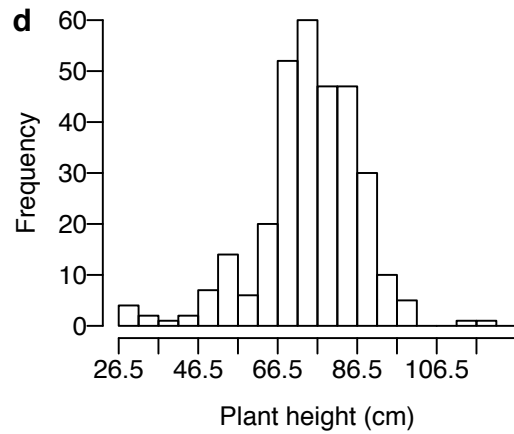

**Additional file 4: Frequency distribution of observations of four agronomic traits in soybean.** (a) Days to flowering, (b) Days to maturity, (c) Duration of flowering-to-maturity and (d) Plant height. Shown is the average of each trait in a population of 309 germplasm accessions over 3 environments each with 3 replicates.
