# Supplementary material for: Genome-wide association study for flowering time, maturity dates and plant height in early maturing soybean (Glycine max) germplasm
Source: PubMed Central journal article supplement (PMC4449526; doi:10.1186/s12864-015-1441-4), 2015-03-20
Supplement: 12864_2015_1441_MOESM5_ESM.pdf [file 12864_2015_1441_MOESM5_ESM.pdf]

**Additional file 5: Correlation coefficients of each pair of traits<sup>a</sup>.**

|             | <b>DTF</b> | <b>DTM</b> | <b>DFTM</b> |
|-------------|------------|------------|-------------|
| <b>DTM</b>  | 0.34*      |            |             |
| <b>DFTM</b> | -0.47*     | 0.63*      |             |
| <b>PH</b>   | 0.26*      | 0.54*      | 0.3*        |

<sup>a</sup> Data averaged over three environments was used to calculate the correlation coefficients.

\* Significant at  $P < 10^{-4}$

DTF, days to flowering; DTM, days to maturity; DFTM, duration from flowering to maturity; PH, plant height.
