# Supplementary material for: Genome-wide association study for flowering time, maturity dates and plant height in early maturing soybean (Glycine max) germplasm
Source: PubMed Central journal article supplement (PMC4449526; doi:10.1186/s12864-015-1441-4), 2015-03-20
Supplement: 12864_2015_1441_MOESM8_ESM.pdf [file 12864_2015_1441_MOESM8_ESM.pdf]

**Additional file 8: List of loci significantly associated with days to flowering (DTF) and maturity (DTM), duration of flowering-to-maturity (DFTM) and plant height (PH) in soybean.**

| Traits | Loci | SNP <sup>a</sup> | Alleles<br>(minor :<br>major) | MAF <sup>b</sup> | Allelic<br>effect <sup>c</sup><br>(day) | P-value | Candidate<br>genes <sup>d</sup>              | Annotation                                        | Known-loci <sup>e</sup>                       |
|--------|------|------------------|-------------------------------|------------------|-----------------------------------------|---------|----------------------------------------------|---------------------------------------------------|-----------------------------------------------|
| DTF    | 1    | Gm01_50219219    | A:C                           | 0.08             | 1.2                                     | 4.5E-05 | <i>Glyma01g37980</i>                         | Late embryogenesis<br>abundant protein            |                                               |
|        | 2    | Gm02_4465606     | T:C                           | 0.30             | 0.7                                     | 1.9E-04 | <i>Glyma02g05580</i>                         | Zinc finger protein                               |                                               |
|        | 3    | Gm06_6074331     | G:A                           | 0.12             | 1.4                                     | 1.5E-07 | <i>Glyma06g08270</i>                         | AIG2-like                                         |                                               |
|        | 4    | Gm06_16723946    | G:A                           | 0.15             | 1.1                                     | 3.2E-05 | <i>Glyma06g20310</i>                         | AtBUC2 [1]                                        | Fflr 18-2, Ft 5-1                             |
|        | 5    | Gm06_26933523    | T:C                           | 0.09             | 1.2                                     | 4.4E-05 |                                              |                                                   | Ft 4-2, 5-1, FT 2-1, Fflr 12-2, 4-1, 5-1, 9-1 |
|        | 6    | Gm07_5957056     | G:A                           | 0.17             | 0.9                                     | 7.1E-05 |                                              |                                                   | Fflr 2-2                                      |
|        | 7    | Gm07_7394287     | T:C                           | 0.17             | 0.8                                     | 1.7E-04 | <i>Glyma07g08890</i><br><i>Glyma07g08831</i> | AtAGL6 [2], GmSOC1 [3]                            | Fflr 2-2                                      |
|        | 8    | Gm07_11068398    | G:A                           | 0.36             | -0.8                                    | 4.3E-05 |                                              |                                                   | Fflr 2-2                                      |
|        | 9    | Gm07_38991567    | G:A                           | 0.31             | 0.6                                     | 2.1E-04 |                                              |                                                   |                                               |
|        | 10   | Gm08_17819435    | C:T                           | 0.18             | 1.0                                     | 3.6E-05 |                                              |                                                   |                                               |
|        | 11   | Gm08_44265646    | C:T                           | 0.20             | 0.7                                     | 4.8E-05 | <i>Glyma08g44640</i><br><i>Glyma08g44650</i> | AtVRN1 [4]                                        |                                               |
|        | 12   | Gm08_44602360    | G:A                           | 0.21             | 0.8                                     | 5.6E-06 |                                              |                                                   |                                               |
|        | 13   | Gm08_44814503    | C:T                           | 0.23             | 0.7                                     | 5.2E-05 | <i>Glyma08g45680</i>                         | FAR1 DNA-binding domain<br>containing protein [5] |                                               |
|        | 14   | Gm09_4388948     | T:C                           | 0.19             | 0.9                                     | 5.4E-05 |                                              |                                                   |                                               |
|        | 15   | Gm09_6197309     | G:A                           | 0.18             | 0.8                                     | 1.9E-04 |                                              |                                                   |                                               |
|        | 16   | Gm09_6976053     | A:G                           | 0.13             | 1.0                                     | 2.1E-05 | <i>Glyma09g07980</i>                         | AtELF8/AtVIP6 [6]                                 | Ft 3-3                                        |
|        | 17   | Gm11_1395042     | C:T                           | 0.39             | 0.6                                     | 2.0E-04 | <i>Glyma11g02230</i>                         | Nucleoporin-related                               |                                               |
|        | 18   | Gm11_17274491    | T:C                           | 0.12             | 1.2                                     | 2.1E-06 | <i>Glyma11g20470</i>                         | Heparansulfate 6-o-<br>sulfotransferase 3         |                                               |
|        | 19   | Gm13_39699161    | C:T                           | 0.18             | 0.9                                     | 8.5E-05 | <i>Glyma13g38975</i>                         | AtCLV3 [7]                                        |                                               |
|        | 20   | Gm14_2918117     | T:C                           | 0.14             | 1.1                                     | 9.2E-05 |                                              |                                                   |                                               |
|        | 21   | Gm14_45475177    | G:A                           | 0.08             | 1.2                                     | 2.8E-05 | <i>Glyma14g36221</i>                         | AtAGL16 [8]                                       | Ft 3-1                                        |
|        | 22   | Gm18_48177289    | C:A                           | 0.09             | 1.4                                     | 1.3E-05 |                                              |                                                   | Fflr 10-2                                     |

|      |    |               |     |      |      |         |                      |                                                                     |
|------|----|---------------|-----|------|------|---------|----------------------|---------------------------------------------------------------------|
|      | 23 | Gm18_60868392 | T:C | 0.19 | 1.0  | 1.4E-06 |                      |                                                                     |
|      | 24 | Gm19_40662679 | T:G | 0.34 | -0.7 | 6.9E-05 |                      | Fflr 15-2, 16-4, 2-3, 4-3                                           |
|      | 25 | Gm20_276793   | G:T | 0.14 | 0.9  | 3.7E-05 | <i>Glyma20g00440</i> | Jumonji domain containing protein [9]                               |
|      | 26 | Gm20_23754062 | G:A | 0.14 | 1.3  | 1.6E-06 | <i>Glyma20g16880</i> | AtEMF2 [10] FT 2-3                                                  |
|      |    | Gm20_26991347 | C:T | 0.15 | 1.4  | 5.5E-08 |                      |                                                                     |
|      |    | Gm20_27852579 | C:T | 0.15 | 1.4  | 5.5E-08 |                      |                                                                     |
|      |    | Gm20_29208847 | C:T | 0.12 | 1.4  | 9.1E-08 |                      |                                                                     |
|      |    | Gm20_29983050 | G:A | 0.13 | 1.4  | 9.7E-08 | <i>Glyma20g21082</i> | AtAGL6 [2]                                                          |
|      | 27 | Gm20_46730763 | G:T | 0.05 | 1.4  | 5.6E-05 | <i>LOC100812369</i>  | AP2/ERF and B3 domain-containing transcription factor [11]          |
| DTM  | 1  | Gm11_10152581 | T:C | 0.08 | -1.6 | 5.2E-06 | <i>Glyma11g14150</i> | RNA-BINDING PROTEIN                                                 |
|      | 2  | Gm16_2412662  | T:C | 0.47 | -0.9 | 2.5E-06 | <i>Glyma16g02840</i> | AtLEW3 [12]                                                         |
|      | 3  | Gm16_2824073  | T:G | 0.11 | -1.2 | 4.3E-06 |                      |                                                                     |
|      | 4  | Gm16_3006858  | C:T | 0.19 | -1.2 | 3.8E-06 | <i>Glyma16g03580</i> | Ring finger containing protein                                      |
|      | 5  | Gm19_45000827 | C:A | 0.05 | -2.3 | 7.6E-06 | <i>Dtl</i>           | AtTFL1 [13] Pod mat 13-6                                            |
|      | 6  | Gm19_47909005 | A:G | 0.21 | 1.2  | 1.1E-05 |                      |                                                                     |
| DFTM | 1  | Gm02_49988138 | T:G | 0.19 | 0.9  | 1.8E-05 |                      |                                                                     |
|      | 2  | Gm03_1597206  | T:G | 0.15 | 0.9  | 8.6E-05 |                      |                                                                     |
|      | 3  | Gm03_5316197  | T:C | 0.08 | 1.3  | 9.7E-05 |                      |                                                                     |
|      | 4  | Gm03_11220188 | A:G | 0.08 | -1.2 | 1.5E-04 |                      | Pod mat 20-2                                                        |
|      | 5  | Gm03_36330058 | A:G | 0.49 | -0.9 | 7.3E-06 |                      |                                                                     |
|      | 6  | Gm04_35149844 | C:T | 0.25 | -1.2 | 4.2E-07 |                      | Pod mat 18-3                                                        |
|      | 7  | Gm06_10263943 | C:A | 0.06 | -1.6 | 1.9E-05 |                      |                                                                     |
|      | 8  | Gm06_16167243 | A:G | 0.07 | 1.6  | 2.3E-05 | <i>Glyma06g19820</i> | Betaine-aldehyde dehydrogenase R3 2-1, R5 3-2, R7 2-1, Pod mat 25-2 |
|      | 9  | Gm08_1966701  | G:T | 0.18 | -0.9 | 5.1E-05 | <i>Glyma08g02881</i> | Unknown                                                             |

|    |                 |               |     |      |       |         |                      |                                                    |
|----|-----------------|---------------|-----|------|-------|---------|----------------------|----------------------------------------------------|
| PH | 10              | Gm08_2636067  | G:T | 0.12 | -1.0  | 8.3E-05 |                      |                                                    |
|    | 11              | Gm09_6970117  | T:G | 0.14 | -1.1  | 2.7E-05 | <i>Glyma09g07980</i> | AtELF8/AtVIP6 [6] Pod mat 16-3, 5-2                |
|    | 12              | Gm09_41155181 | T:C | 0.31 | -0.8  | 3.5E-06 |                      | Pod mat 27-2                                       |
|    | 13              | Gm11_9332515  | A:G | 0.18 | 0.8   | 1.8E-05 | <i>Glyma11g13090</i> | Serine-threonine protein kinase Pod mat 17-2, 18-2 |
|    | 14              | Gm12_4363882  | C:T | 0.08 | 1.4   | 5.7E-06 |                      |                                                    |
|    | 15              | Gm15_1609497  | T:C | 0.08 | 1.2   | 4.0E-05 | <i>Glyma15g02390</i> | Mitochondrial processing peptidase                 |
|    | 16              | Gm16_2412662  | T:C | 0.47 | -0.7  | 4.2E-05 | <i>Glyma16g02840</i> | AtLEW3 [12]                                        |
|    | 17 <sup>f</sup> | Gm16_2997247  | C:T | 0.11 | -1.0  | 6.7E-06 | <i>Glyma16g03570</i> | WRKY family transcription factor                   |
|    | 18              | Gm19_45255796 | A:G | 0.16 | 1.2   | 6.5E-05 |                      | R5 1-2, Pod mat 24-10, 24-4, 10-4, 13-6, 4-3       |
|    | 1               | Gm04_5175822  | A:G | 0.06 | -11.5 | 1.0E-07 |                      |                                                    |
|    | 2               | Gm06_14889674 | C:T | 0.19 | -4.5  | 4.4E-05 |                      |                                                    |
|    | 3               | Gm08_42349221 | C:T | 0.06 | -7.2  | 1.3E-05 |                      |                                                    |
|    | 4               | Gm09_9623583  | T:G | 0.21 | 3.6   | 8.8E-05 |                      | Plant height 18-3                                  |
|    | 5               | Gm09_40958920 | C:T | 0.08 | -5.8  | 1.6E-04 | <i>Glyma09g34601</i> | AtBRX [14]                                         |
|    | 6               | Gm09_41147947 | C:T | 0.14 | -5.1  | 1.3E-05 |                      |                                                    |
|    | 7               | Gm10_7796028  | A:C | 0.09 | 6.6   | 7.2E-07 | <i>Glyma10g08930</i> | GDSL-like Lipase                                   |
|    | 8               | Gm11_6078943  | C:A | 0.06 | -9.0  | 8.6E-06 |                      | Plant height 24-4                                  |
|    | 9               | Gm12_128224   | T:C | 0.12 | -5.6  | 8.7E-05 | <i>Glyma12g00320</i> | AtSAC1 [15]                                        |
|    | 10              | Gm12_8911538  | G:A | 0.10 | 4.7   | 9.6E-05 |                      |                                                    |
|    | 11              | Gm13_36042528 | G:A | 0.41 | 3.7   | 6.3E-06 |                      | Plant height 17-1                                  |
|    | 12              | Gm13_36823931 | G:T | 0.39 | 3.5   | 1.9E-05 |                      | Plant height 17-1                                  |
|    | 13              | Gm13_42933309 | C:T | 0.08 | -6.9  | 8.2E-06 |                      |                                                    |
|    | 14              | Gm14_48703687 | G:T | 0.28 | 3.7   | 1.4E-05 |                      |                                                    |
|    | 15              | Gm15_3135042  | G:A | 0.06 | -7.2  | 5.0E-06 |                      |                                                    |

|    |               |     |      |       |         |                      |                                                                    |
|----|---------------|-----|------|-------|---------|----------------------|--------------------------------------------------------------------|
| 16 | Gm15_25719454 | T:G | 0.05 | -7.6  | 1.6E-05 |                      | Plant height 26-10                                                 |
| 17 | Gm16_5773005  | G:A | 0.07 | -6.1  | 4.5E-05 | <i>Glyma16g06333</i> | ASB1/TRP4/WEI7                                                     |
| 18 | Gm16_29597918 | G:A | 0.07 | -10.8 | 1.0E-08 | <i>Glyma16g25570</i> | AtHAM4 [16]                                                        |
| 19 | Gm17_40318849 | A:G | 0.38 | -3.7  | 2.7E-05 | <i>Glyma17g36350</i> | Unknown                                                            |
| 20 | Gm17_40538815 | T:C | 0.12 | -6.2  | 5.8E-06 |                      |                                                                    |
| 21 | Gm18_58462762 | A:C | 0.22 | -3.7  | 6.2E-05 | <i>Glyma18g49080</i> | AtPIN1 [17] Plant height 17-3, 25-5, 26-12, 33-2, 33-8, 34-2, 34-8 |
| 22 | Gm18_60516754 | A:C | 0.08 | -7.2  | 4.0E-05 |                      | Plant height 26-12, 33-2, 34-2                                     |
| 23 | Gm19_8629858  | G:A | 0.05 | -9.1  | 1.5E-06 |                      |                                                                    |
| 24 | Gm19_44389764 | T:C | 0.11 | -10.9 | 3.7E-11 | <i>Glyma19g37180</i> | Pectin lyase-like [18] Plant height 1-1, 6-1 and 10-4              |
| 25 | Gm19_45000827 | C:A | 0.05 | -16.0 | 3.0E-15 | <i>Dtl</i>           | AtTFL1 [13] Plant height 4-2 and 13-8                              |
| 26 | Gm20_376751   | C:T | 0.15 | 4.3   | 4.7E-05 |                      |                                                                    |
| 27 | Gm20_35951388 | C:T | 0.17 | -4.4  | 7.5E-05 |                      |                                                                    |

<sup>a</sup> Start with the chromosome number and followed by physical position of the marker on that chromosome.

<sup>b</sup> MAF, minor allele frequency

<sup>c</sup> Respect to minor allele.

<sup>d</sup> Genes annotated in Glyma1.1, Glyma1.0, and NCBI RefSeq gene models in SoyBase ([www.soybase.org](http://www.soybase.org)) were used as the source of candidate genes.

<sup>e</sup> Based on the QTL list on SoyBase ([www.soybase.org](http://www.soybase.org)).

<sup>f</sup> The SNP was also detected significantly associated with DTM and was clumped in the locus DTM4.

## References

1. Cao Y, Dai Y, Cui SJ, Ma LG: **Histone H2B Monoubiquitination in the Chromatin of FLOWERING LOCUS C Regulates Flowering Time in Arabidopsis.** *Plant Cell* 2008, **20**(10):2586-2602.
2. Yoo SK, Wu X, Lee JS, Ahn JH: **AGAMOUS-LIKE 6 is a floral promoter that negatively regulates the FLC/MAF clade genes and positively regulates FT in Arabidopsis.** *The Plant Journal* 2011, **65**(1):62-76.
3. Zhong XF, Dai X, Xv JH, Wu HY, Liu B, Li HY: **Cloning and expression analysis of GmGAL1, SOC1 homolog gene in soybean.** *Mol Biol Rep* 2012, **39**(6):6967-6974.
4. Levy YY, Mesnage S, Mylne JS, Gendall AR, Dean C: **Multiple roles of Arabidopsis VRN1 in vernalization and flowering time control.** *Science* 2002, **297**(5579):243-246.
5. Hudson M, Ringli C, Boylan MT, Quail PH: **The FAR1 locus encodes a novel nuclear protein specific to phytochrome A signaling.** *Gene Dev* 1999, **13**(15):2017-2027.
6. Oh S, Zhang H, Ludwig P, van Nocker S: **A mechanism related to the yeast transcriptional regulator Paf1c is required for expression of the Arabidopsis FLC/MAF MADS box gene family.** *Plant Cell* 2004, **16**(11):2940-2953.
7. Clark SE, Running MP, Meyerowitz EM: **Clavata3 Is a Specific Regulator of Shoot and Floral Meristem Development Affecting the Same Processes as Clavata1.** *Development* 1995, **121**(7):2057-2067.

8. Alvarez-Buylla ER, Liljegren SJ, Pelaz S, Gold SE, Burgeff C, Ditta GS, Vergara-Silva F, Yanofsky MF: **MADS-box gene evolution beyond flowers: expression in pollen, endosperm, guard cells, roots and trichomes.** *Plant J* 2000, **24**(4):457-466.
9. Noh B, Lee SH, Kim HJ, Yi G, Shin EA, Lee M, Jung KJ, Doyle MR, Amasino RM, Noh YS: **Divergent roles of a pair of homologous jumonji/zinc-finger-class transcription factor proteins in the regulation of Arabidopsis flowering time.** *Plant Cell* 2004, **16**(10):2601-2613.
10. Yoshida N, Yanai Y, Chen LJ, Kato Y, Hiratsuka J, Miwa T, Sung ZR, Takahashi S: **EMBRYONIC FLOWER2, a novel polycomb group protein homolog, mediates shoot development and flowering in Arabidopsis.** *Plant Cell* 2001, **13**(11):2471-2481.
11. Jofuku KD, Denboer BGW, Vanmontagu M, Okamuro JK: **Control of Arabidopsis Flower and Seed Development by the Homeotic Gene *Apetala2*.** *Plant Cell* 1994, **6**(9):1211-1225.
12. Zhang M, Henquet M, Chen ZZ, Zhang HR, Zhang Y, Ren XZ, van der Krol S, Gonneau M, Bosch D, Gong ZZ: **LEW3, encoding a putative alpha-1,2-mannosyltransferase (ALG11) in N-linked glycoprotein, plays vital roles in cell-wall biosynthesis and the abiotic stress response in Arabidopsis thaliana.** *Plant J* 2009, **60**(6):983-999.
13. Liu B, Watanabe S, Uchiyama T, Kong F, Kanazawa A, Xia Z, Nagamatsu A, Arai M, Yamada T, Kitamura K *et al*: **The soybean stem growth habit gene *Dt1***

- is an ortholog of Arabidopsis TERMINAL FLOWER1. *Plant Physiol* 2010, **153**(1):198-210.
14. Beuchat J, Li S, Ragni L, Shindo C, Kohn MH, Hardtke CS: **A hyperactive quantitative trait locus allele of Arabidopsis BRX contributes to natural variation in root growth vigor.** *Proc Natl Acad Sci U S A* 2010, **107**(18):8475-8480.
  15. Zhong R, Burk DH, Nairn CJ, Wood-Jones A, Morrison WH, 3rd, Ye ZH: **Mutation of SAC1, an Arabidopsis SAC domain phosphoinositide phosphatase, causes alterations in cell morphogenesis, cell wall synthesis, and actin organization.** *Plant Cell* 2005, **17**(5):1449-1466.
  16. Engstrom EM, Andersen CM, Gumulak-Smith J, Hu J, Orlova E, Sozzani R, Bowman JL: **Arabidopsis homologs of the petunia hairy meristem gene are required for maintenance of shoot and root indeterminacy.** *Plant Physiol* 2011, **155**(2):735-750.
  17. Sassi M, Lu Y, Zhang Y, Wang J, Dhonukshe P, Blilou I, Dai M, Li J, Gong X, Jaillais Y: **COP1 mediates the coordination of root and shoot growth by light through modulation of PIN1-and PIN2-dependent auxin transport in Arabidopsis.** *Development* 2012, **139**(18):3402-3412.
  18. Derbyshire P, McCann MC, Roberts K: **Restricted cell elongation in Arabidopsis hypocotyls is associated with a reduced average pectin esterification level.** *BMC plant biology* 2007, **7**(1):31.
